# Supplementary material for: Melamine-mediated supramolecular assembly of nucleobase-modified poly(l-lysine)
Source: Royal Society of Chemistry journal article supplement (doi:10.1039/c9py01413f), 2019-01-01
Supplement: c9py01413f1.pdf [file c9py01413f1.pdf]

## Supporting Information

### Melamine-Mediated Supramolecular Assembly of Nucleobase- modified Poly(L-lysine)

*Luqi Zhu, Yan Xiao\*, Jiaxiao Zhang, Siqi Zheng, Meidong Lang\**

Key Laboratory for Ultrafine Materials of Ministry of Education, School of Materials

Science and Engineering, East China University of Science and Technology,

Shanghai, 200237, China

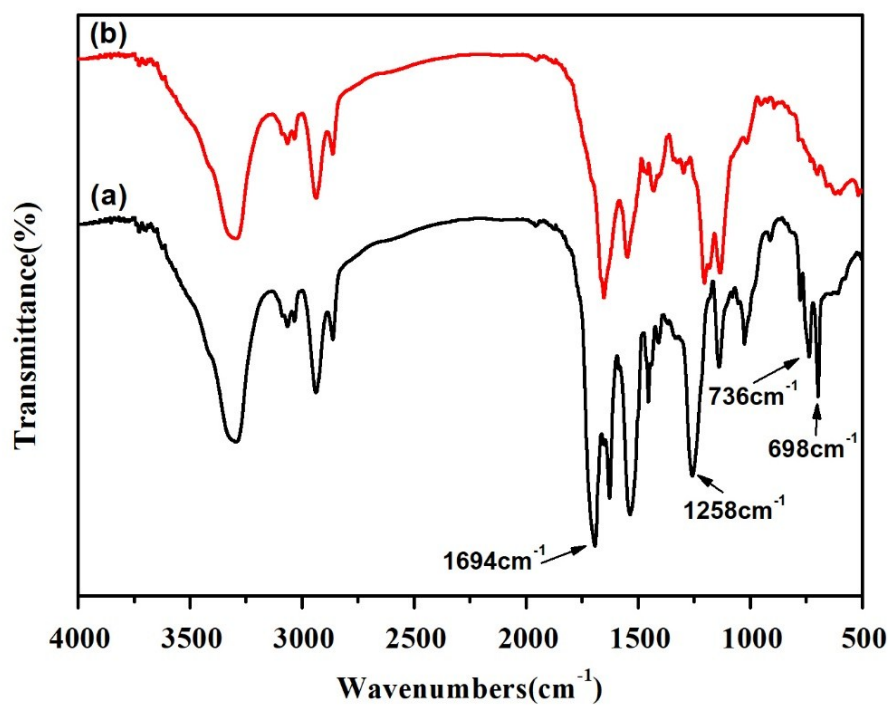

**Fig. S1** FT-IR spectra of (a) PZLL, (b) PLL

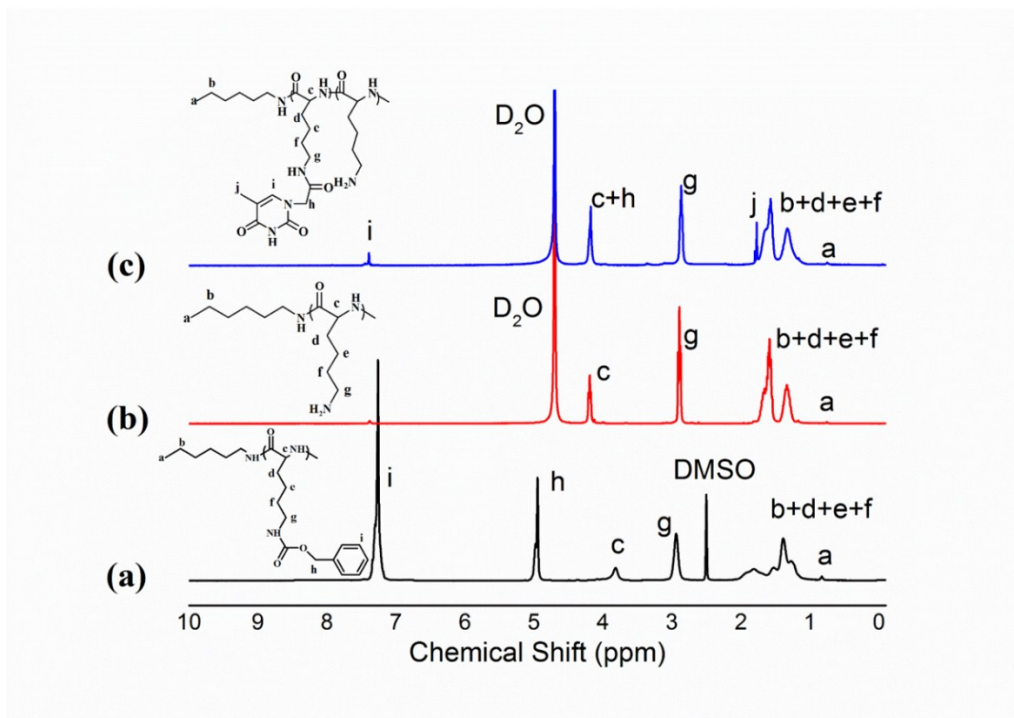

Fig. S2  $^1\text{H}$  NMR spectra of (a) PZLL, (b) PLL, (c) PLL-co-PTLL

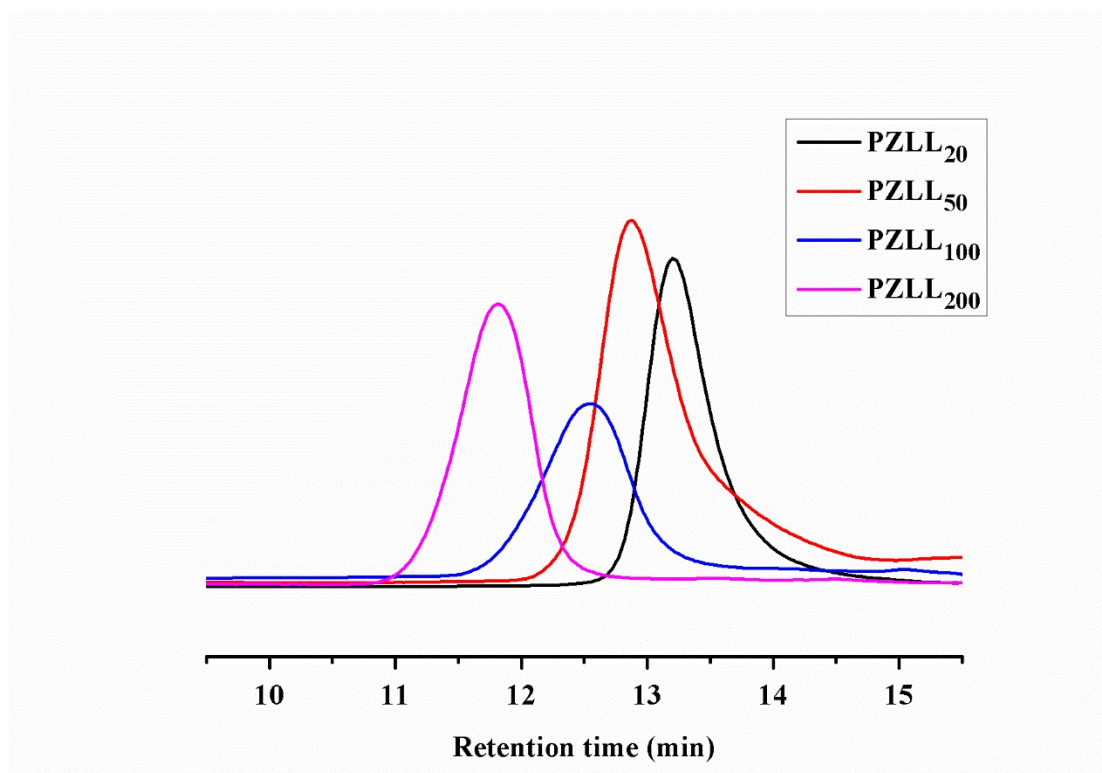

Fig. S3 GPC curves of PZLL<sub>20</sub>, PZLL<sub>50</sub>, PZLL<sub>100</sub> and PZLL<sub>200</sub>

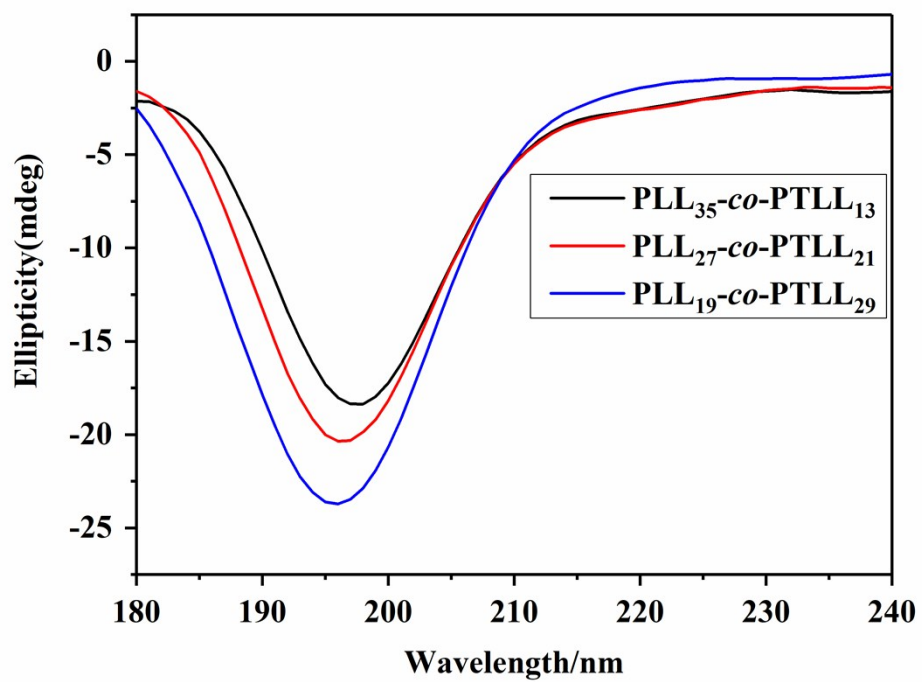

**Fig. S4** CD spectrum of PLL<sub>35</sub>-co-PTLL<sub>13</sub>, PLL<sub>27</sub>-co-PTLL<sub>21</sub> and PLL<sub>19</sub>-co-PTLL<sub>29</sub>
